# Supplementary material for: Developing a programme theory to explain how primary health care teams learn to respond to intimate partner violence: a realist case-study
Source: BMC Health Serv Res. 2015 Jun 9;15:228. doi: 10.1186/s12913-015-0899-8 (PMC4460973; doi:10.1186/s12913-015-0899-8)
Supplement: Additional file 1: — Data collection and main findings from the application of the PREMIS and the Social Network Analysis questionnaires. [file 12913_2015_899_MOESM1_ESM.pdf]

<?xml version="1.0" encoding="UTF-8"?><!DOCTYPE JobSheet PUBLIC "-//Springer-Verlag//DTD A++ V2.4//EN" "http://devel.springer.de/A++/V2.4/DTD/A++V2.4JobSheetV2.4.1.dtd"><JobSheet Version="2.4.1" ObjectID="09011a6a8d3936d3" JobSheetDate="2015-06-03 17:17:07" Supplier="FullServiceVendor"><ArticleJobSheet><PublisherInfo><PublisherName>BioMed Central</PublisherName><PublisherLocation>London</PublisherLocation><PublisherImprintName>BioMed Central</PublisherImprintName></PublisherInfo><JournalInfo JournalProductType="ArchiveJournal" NumberingStyle="Unnumbered" OutputMedium="Online"><JournalID>12913</JournalID><JournalElectronicISSN>1472-6963</JournalElectronicISSN><JournalTitle>BMC Health Services Research</JournalTitle><JournalAbbreviatedTitle>BMC Health Serv Res</JournalAbbreviatedTitle><JournalSubjectGroup><JournalSubject Type="Primary">Medicine &amp; Public Health</JournalSubject><SubjectCollection Code="SC11">Medicine</SubjectCollection></JournalSubjectGroup></JournalInfo><ArticleInfo Language="En" ArticleType="OriginalPaper" NumberingStyle="Unnumbered" TocLevels="0" ContainsESM="Yes" OutputMedium="Online"><ArticleID>899</ArticleID><ArticleDOI>10.1186/s12913-015-0899-8</ArticleDOI><ArticleTitle Language="En">Developing a programme theory to explain how primary health care teams learn to respond to intimate partner violence: A realist case-study</ArticleTitle><ArticleCategory>Research article</ArticleCategory><ArticleHistory><RegistrationDate><Year>2015</Year><Month>6</Month><Day>2</Day></RegistrationDate><Received><Year>2014</Year><Month>1</Month><Day>2</Day></Received><Accepted><Year>2015</Year><Month>6</Month><Day>2</Day></Accepted></ArticleHistory><ArticleCopyright><CopyrightHolderName>Goicolea et al.</CopyrightHolderName><CopyrightYear>2015</CopyrightYear><License SubType="CC BY" Type="OpenAccess" Version="2.0"><SimplePara>This is an Open Access article distributed under the terms of the Creative Commons Attribution License (http://creativecommons.org/licenses/by/2.0), which permits unrestricted use, distribution, and reproduction in any medium, provided the original work is properly credited. The Creative Commons Public Domain Dedication waiver (http://creativecommons.org/publicdomain/zero/1.0/) applies to the data made available in this article, unless otherwise stated.</SimplePara></License></ArticleCopyright></ArticleInfo><AuthorGroup><Author><AuthorName><GivenName>Isabel</GivenName><FamilyName>Goicolea</FamilyName></AuthorName><Contact><Email>isabel.goicolea@epiph.umu.se</Email></Contact></Author></AuthorGroup><ProductionInfo><SPACEInfo PublicationObjectID="09011a6a8d370c4d" SupplierSPACEID="29907"/><ManuscriptInfo><EditorialManuscriptNumber>2138830540117593</EditorialManuscriptNumber><ElectronicDelivery Delivery="Complete"/><PostalDelivery Delivery="None"/></ManuscriptInfo><ProductionEditor><ProductionEditorName><GivenName>Marleen</GivenName><FamilyName>Kramer</FamilyName></ProductionEditorName><Contact><Street>236 Grays Inn Road</Street><City>London</City><Country>GB</Country><Email>marleen.kramer@biomedcentral.com</Email></Contact></ProductionEditor><TechnicalInfo><TitleUpperCase Letters="InitialWord"/><AuthorInformationStyle Biography="No" CapturePrefix="No" Photograph="No"/><HistoryStyle Accepted="Yes" Received="Yes" Revised="No"/><AbstractInDocumentLanguage Type="Permitted"/><StructuredAbstract Type="Permitted"/><KeywordsInDocumentLanguage Type="Permitted"/><BibliographyStyle Type="Basic"/><CitationStyle Type="Numbered"/><Typesetting RunningHead="Standard" Layout="BMCTwo" LogoOnFirstPage="No" StartPage="Right"/><TextSpecifications GutterMargin="20 mm" TypeareaHeight="226 mm" HeadMargin="12 mm" Bleeds="None" TypeareaWidth="170 mm" PaperStock="Coated Matt"/><ColorSpecifications LayoutColorCount="1"><LayoutColorName>Black</LayoutColorName></ColorSpecifications><FormatTrimSize>210 x 279 mm</FormatTrimSize><ReferencePDFStyle Type="Unedited"/></TechnicalInfo><DiscreteObjectTechnicalInfo ContainsColorImages="No" ColorInPrint="No"><StyleInfo><!--MarkupProfile: For details see markup instructions in journal spreadsheet.--><MarkupProfile Name="Profile1"/><PrepressProfile Name="Profile1"/></StyleInfo></DiscreteObjectTechnicalInfo><WorkflowInfo TaskType="PrepareContent"><Priority Level="High"/><Deadline><OnlineFirstDeadline><Year>2015</Year><Month>6</Month><Day>19</Day></OnlineFirstDeadline></Deadline><Supplier><FullServiceVendor><CompanyName>SPI Publisher Services for BMC</CompanyName><Contact><Street>Pascor Drive, SPI Building</Street><City>Manila</City><Country>PH</Country><Email>spispringerbmc@spi-global.com</Email></Contact><ContactPerson><ContactPersonName><GivenName>Denver</GivenName><FamilyName>Pareja</FamilyName></ContactPersonName></ContactPerson><RemarkTo>This article is for journal section "Organization, structure and delivery of healthcare". Please mark up using CharacteristicValueElement tag.</RemarkTo><CopyEditing Category="1"/><FilesToSupplier><ContentFiles><File><Archive Content="Manuscript" FileRef="12913_BMC_2138830540117593.zip" ObjectID="09011a6a8d370c85"/></File></ContentFiles></FilesToSupplier><Deliverables><DeliverablesForDiscreteObjects XMLWithBody="Yes" XMLWithBodyRefsOnly="No" OnlinePDF="Yes" PrintPDF="No" eBookPDF="No" TEX="No" OnlineMediaObjects="IfApplies" PrintMediaObjects="No" ReferencePDF="Yes" AuthorFeedbackPDF="No" DeltaPDF="No" CopyrightTransfer="No" OpenAccessStatement="No" OffprintOrder="No" Pit-Stop-Reports="Yes" Manuscript="No" PRS-Metadata="No" EpsilonPDF="No" CorrectionSheet="IfApplies" PeerReviewPDFs="No"/></Deliverables><FilesToPublisher><ContentFiles><File><AplusplusRootFile FileRef="12913_2015_899_Article.xml"/></File><File><RenditionItem FileRef="12913_2015_899_OnlinePDF.pdf" TargetType="OnlinePDF"/></File><File><WorkItem FileRef="12913_2015_899_ReferencePDF.pdf" ItemType="ReferencePDF"/></File><File><WorkItem FileRef="12913_2015_899_PitStopReport_OnlinePDF.pdf" ItemType="Pit-Stop-Report"/></File><File><MediaObject><ImageObject FileRef="12913_2015_899_Fig1_HTML.gif" Format="GIF" Color="BlackWhite" Type="Linedraw" Rendition="HTML"/></MediaObject></File><File><MediaObject><DataObject FileRef="12913_2015_899_MOESM1_ESM.pdf"/></MediaObject></File><File><MediaObject><DataObject FileRef="12913_2015_899_MOESM2_ESM.doc"/></MediaObject></File></ContentFiles></FilesToPublisher></FullServiceVendor></Supplier></WorkflowInfo></ProductionInfo></ArticleJobSheet></JobSheet>
